# Supplementary material
Source: PubMed Central journal article supplement (PMC4664231)
Supplement: me-15-1161.pdf [file me-15-1161.pdf]

**Supplemental Figure 1. GPRC6A Homology Modelling.** (A) MSA between 16 sequences shown using clustalx color code. Alignment is shown for helix-4, extracellular loop-2 and helix-5 regions. (B) Sequence similarity scores between 16 sequences after MSA. Sequence 1: GPRC6A, Sequences 2-9: class-C GPCR's, Sequences 10-16: class-A GPCR's. mGluR-1 (sequence-2) and mGluR-5 (sequence-3) taken as main templates for transmembrane domain modelling (C, D) GPRC6A transmembrane homology models based on the mGlu-1 and mGlu-5 receptor structures.

**Supplemental Figure 2. Generation of GPRC6A knockdown PC-3 cells using CRISPR-Cas9 system.**

(A) The lentiCRISPR vector from Addgene. Location and sequences of GPRC6A sgRNA-3 (B) , and sequence mutagenesis of GPRC6A in PC-3 cells with CRISPR-Cas9 system (C). GPRC6A messenger RNA (D) and protein expression (E) in GPRC6A knockdown PC-3 cells using CRISPR-Cas9 system.

**Supplemental Figure 3. Docking of DJ-I-267R to GPRC6A.** Residues surrounding DJ-I-267R in the binding pocket.

**Supplemental Figure 4. Docking of DJ-I-267S to GPRC6A.** Residues surrounding DJ-I-267S in the binding pocket.

A

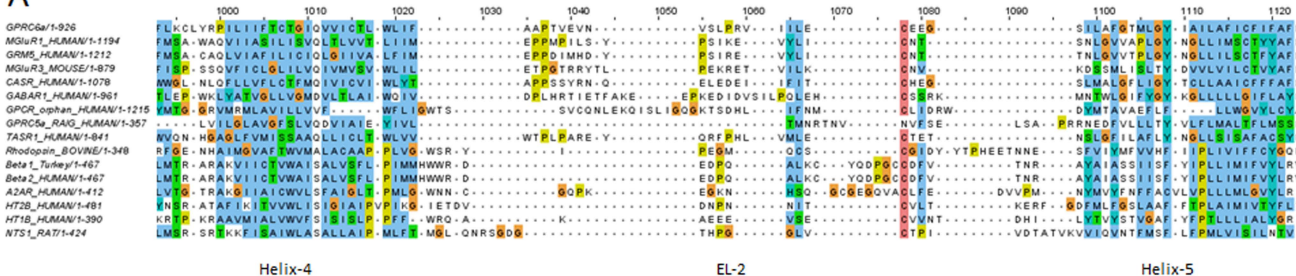

B

|                   | 1    | 2    | 3    | 4    | 5    | 6    | 7    | 8    | 9    | 10   | 11   | 12   | 13   | 14   | 15   | 16 |
|-------------------|------|------|------|------|------|------|------|------|------|------|------|------|------|------|------|----|
| 1:GPRC6a          | 33.5 | 34.2 | 44.7 | 45.0 | 27.5 | 37.9 | 29.1 | 49.2 | 27.6 | 22.5 | 22.5 | 21.4 | 22.9 | 22.1 | 25.9 |    |
| 2:MGIuR1_HUM...   | 43.2 | 73.8 | 62.3 | 44.0 | 29.9 | 25.2 | 35.3 | 43.5 | 24.7 | 24.2 | 24.2 | 23.5 | 23.7 | 19.7 | 23.1 |    |
| 3:GRMS_HUMAN...   | 44.7 | 75.0 | 60.9 | 42.7 | 30.1 | 23.9 | 32.8 | 43.6 | 25.9 | 22.3 | 22.3 | 22.3 | 22.5 | 20.0 | 22.9 |    |
| 4:MGIuR3_MOUSE... | 42.4 | 45.1 | 44.1 | 38.9 | 30.2 | 36.9 | 31.9 | 40.1 | 25.6 | 20.1 | 20.1 | 19.2 | 18.3 | 21.0 | 22.4 |    |
| 5:CASR_HUMAN...   | 52.4 | 39.7 | 38.0 | 47.7 | 27.4 | 20.7 | 31.9 | 49.3 | 26.4 | 20.3 | 20.3 | 19.2 | 22.5 | 20.0 | 23.3 |    |
| 6:GABAR1_HUM...   | 28.5 | 24.0 | 23.8 | 33.0 | 24.4 | 19.8 | 26.3 | 30.6 | 26.1 | 22.3 | 22.3 | 19.7 | 20.4 | 23.6 | 26.9 |    |
| 7:GPCR_orpha...   | 23.4 | 25.6 | 23.9 | 23.3 | 23.4 | 25.0 | 26.9 | 24.3 | 24.7 | 21.0 | 21.0 | 23.5 | 18.7 | 19.2 | 22.9 |    |
| 8:GPRC5a_RAI...   | 31.2 | 10.6 | 9.7  | 33.0 | 10.6 | 9.8  | 7.3  | 31.1 | 19.8 | 16.1 | 16.1 | 16.3 | 16.4 | 16.7 | 18.2 |    |
| 9:TASR1_HUMA...   | 44.7 | 30.7 | 30.3 | 38.3 | 38.5 | 26.7 | 36.8 | 26.1 | 26.1 | 19.5 | 19.5 | 18.0 | 19.8 | 19.2 | 23.6 |    |
| 10:Rhodopsin...   | 30.4 | 7.2  | 7.4  | 10.1 | 8.5  | 9.5  | 7.1  | 19.3 | 10.8 | 26.6 | 26.6 | 29.6 | 27.2 | 33.3 | 29.7 |    |
| 11:Beta1_Turk...  | 31.3 | 9.5  | 8.6  | 10.7 | 8.8  | 10.8 | 8.1  | 21.0 | 10.8 | 35.6 | 99.8 | 40.8 | 37.2 | 46.9 | 34.2 |    |
| 12:Beta2_HUMA...  | 31.3 | 9.5  | 8.6  | 10.7 | 8.8  | 10.8 | 8.1  | 21.0 | 10.8 | 35.6 | 99.8 | 40.8 | 37.2 | 46.9 | 34.2 |    |
| 13:A2AR_HUMAN...  | 9.5  | 8.1  | 7.9  | 9.0  | 7.3  | 8.4  | 8.0  | 18.8 | 8.8  | 35.1 | 36.0 | 36.0 | 33.1 | 35.1 | 29.0 |    |
| 14:HT2B_HUMAN...  | 31.9 | 9.5  | 8.9  | 10.0 | 10.2 | 7.4  | 22.1 | 11.3 | 37.6 | 38.3 | 38.3 | 38.6 | 44.4 | 34.2 |      |    |
| 15:HT1B_HUMAN...  | 9.3  | 6.4  | 6.4  | 9.1  | 7.2  | 9.6  | 6.7  | 18.2 | 8.9  | 37.4 | 39.2 | 39.2 | 33.3 | 36.0 | 31.8 |    |
| 16:NTS1_RAT/1...  | 31.9 | 8.2  | 8.0  | 10.8 | 9.2  | 11.9 | 8.0  | 21.4 | 11.9 | 36.2 | 31.0 | 31.0 | 29.9 | 30.1 | 34.4 |    |

C

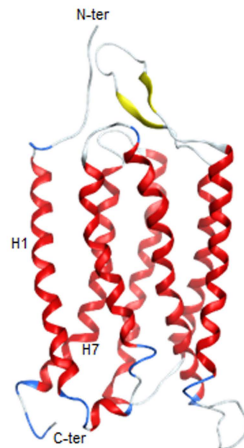

D

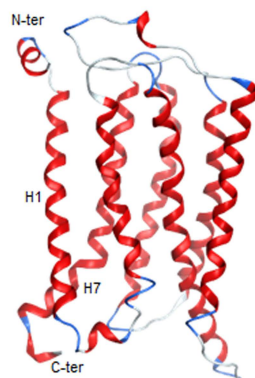

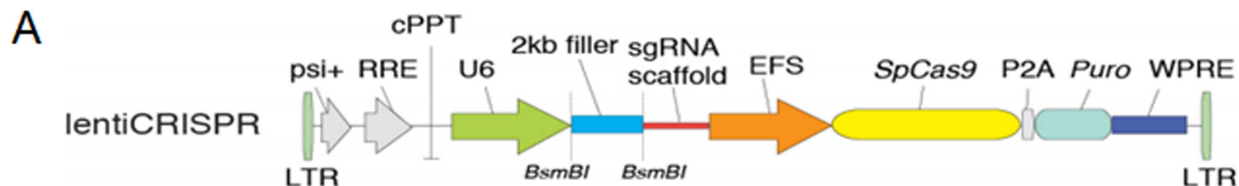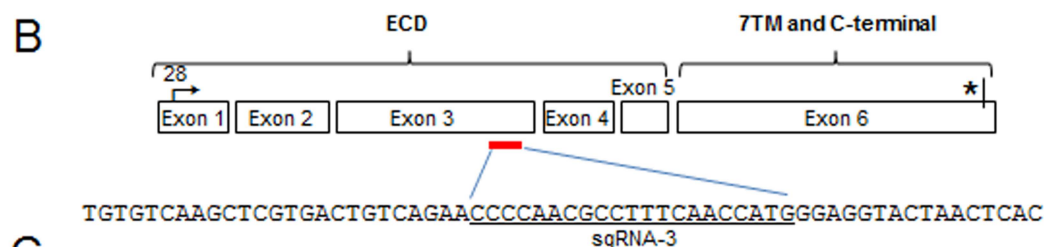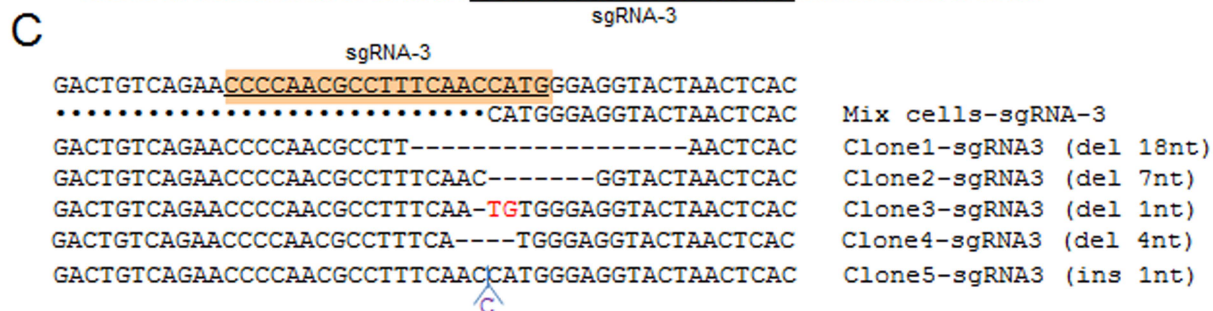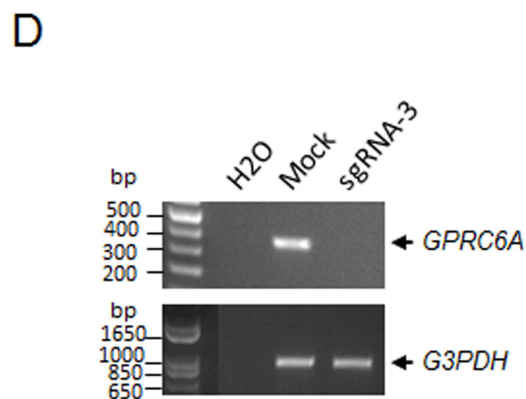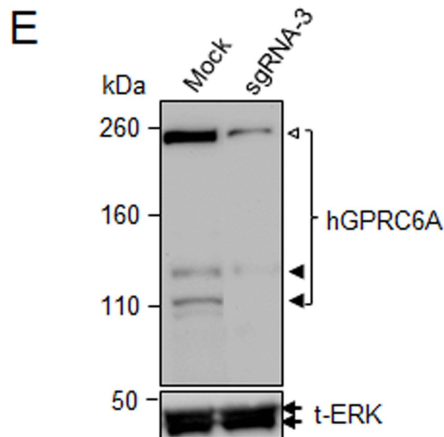

A

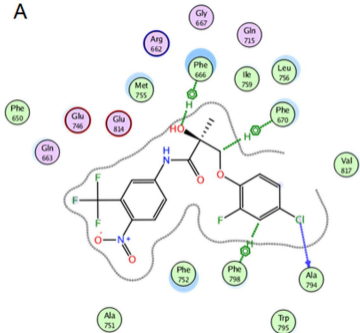

B

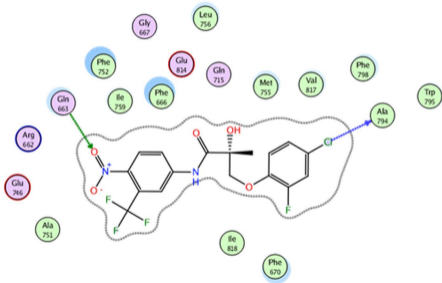

A

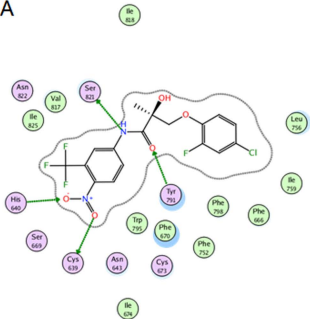

B

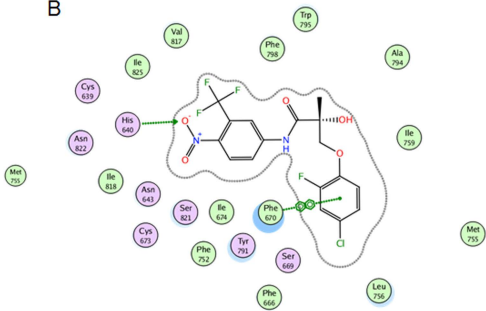

**Supplemental Table 1. The list of SARMs.**

| NAME       | ACTIVITY | STRUCTURE                                                                           |
|------------|----------|-------------------------------------------------------------------------------------|
| DJ-I-17    | ++       | 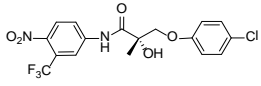   |
| DJ-I-47    | -        |    |
| DJ-I-157   | +        |    |
| DJ-I-225S  | ++       |    |
| DJ-I-267S  | ++       |    |
| DJ-III-127 | ++       |    |
| DJ-III-129 | +        |    |
| DJ-III-159 | ++       |   |
| DJ-IV-5S   | -        |  |
